# Supplementary material for: Factors Associated with Prolonged Antibiotic Therapy in Neonates with Suspected Early-Onset Sepsis
Source: MDPI journal article supplement (doi:10.3390/antibiotics13050388), 2024-04-25
Supplement: s1 [file s1]

## **SUPPLEMENTAL MATERIAL**

**Supplement 1. Maternal Risk Factors & Neonatal Clinical Symptoms**

**Supplement 2. Flowchart Dutch Guideline**

**Supplement 3. Reasons to Continue Antibiotic Therapy**

**References**

## Supplement 1. Maternal Risk Factors & Neonatal Clinical Symptoms

**Table S1. Maternal Risk Factors & Neonatal Clinical Symptoms**

Shown are the maternal risk factors and neonatal clinical signs according to the Dutch guideline,<sup>1</sup> which is an adaptation of the NICE guideline.<sup>2</sup> This table was published earlier as part of a randomised controlled trial protocol.<sup>3</sup>

| Maternal risk factors                                                                                                                                                                                          | Neonatal risk factors                                                                              |
|----------------------------------------------------------------------------------------------------------------------------------------------------------------------------------------------------------------|----------------------------------------------------------------------------------------------------|
| <b>Red flags</b>                                                                                                                                                                                               |                                                                                                    |
| Parenteral antibiotic treatment given to the woman for confirmed or suspected invasive bacterial infection (such as septicemia) at any time during labor, or in the 24-hour periods before and after the birth | Respiratory distress starting more than 4 hours after birth                                        |
| Suspected or confirmed infection in another neonate in case of a multiple pregnancy                                                                                                                            | Neonatal epileptic seizures                                                                        |
|                                                                                                                                                                                                                | Need for mechanical ventilation in a term neonate                                                  |
|                                                                                                                                                                                                                | Signs of shock                                                                                     |
| <b>Non-red flags</b>                                                                                                                                                                                           |                                                                                                    |
| Invasive group B streptococcal infection in a previous neonate                                                                                                                                                 | Altered behavior, -responsiveness or -muscle tone                                                  |
| Maternal group B streptococcal colonization, bacteriuria or infection in the current pregnancy                                                                                                                 | Feeding difficulties (feed refusal, gastric retention, vomiting, distended abdomen)                |
| Suspected or confirmed rupture of membranes without contractions for more than 24 hours in a term birth                                                                                                        | Apnea and bradycardia                                                                              |
| Preterm birth following spontaneous labor (before 37 weeks' gestation)                                                                                                                                         | Signs of respiratory distress (tachypnea, moaning, retractions, nasal flaring)                     |
| Suspected or confirmed rupture of membranes for more than 18 hours in a preterm birth                                                                                                                          | Hypoxia (for example, central cyanosis or reduced oxygen saturation level)                         |
| Intrapartum fever higher than 38°C or suspected or confirmed chorioamnionitis                                                                                                                                  | Neonatal encephalopathy                                                                            |
|                                                                                                                                                                                                                | Need for cardio-pulmonary resuscitation                                                            |
|                                                                                                                                                                                                                | Need for mechanical ventilation in a preterm neonate                                               |
|                                                                                                                                                                                                                | Persistent pulmonary hypertension                                                                  |
|                                                                                                                                                                                                                | Temperature abnormality (lower than 36°C or higher than 38°C) unexplained by environmental factors |
|                                                                                                                                                                                                                | Local signs of infection (for example, affecting the skin or eyes)                                 |

Abbreviation: NICE, National Institute for Health and Care Excellence.

## Supplement 2. Flowchart Dutch Guideline

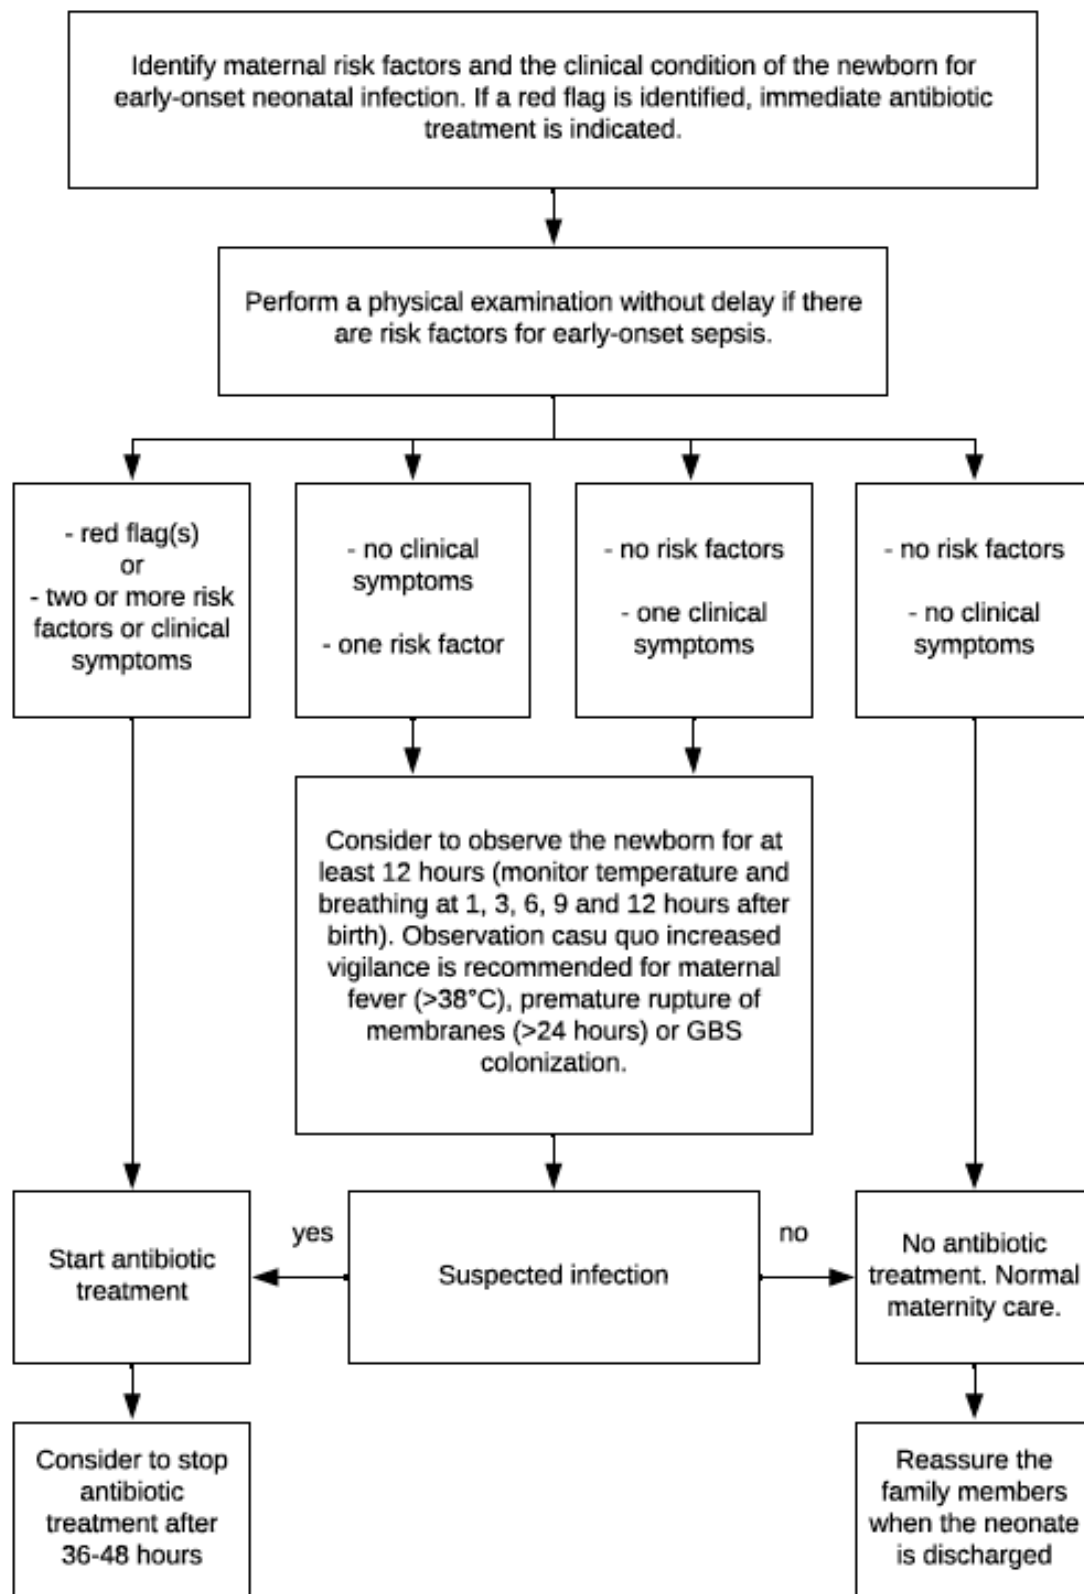

**Figure S1. Flowchart Dutch Guideline**

Shown is the adaptation of the algorithm used in the Dutch guideline to provide guidance for antibiotic treatment prescription according to the number of present maternal risk factors and/or neonatal clinical symptoms, categorised in red flags and non-red flags.<sup>1</sup> This figure was previously published as supplemental material of a multicentre study.<sup>4</sup>

### Supplement 3. Reasons to Continue Antibiotic Therapy

**Table S2. Reasons to continue antibiotic therapy in neonates with a negative blood culture.**

|                                                                            | <b>Prolonged AB<br/>(n=47)</b> |
|----------------------------------------------------------------------------|--------------------------------|
| <b>Neonatal illness at start (n (%))</b>                                   | 4 (8.5)                        |
| <b>Apgar score (n (%))</b>                                                 | 1 (2.1)                        |
| <b>Maternal risk factors (n (%))</b>                                       | 3 (6.4)                        |
| <b>Heart rate (n (%))</b>                                                  | 1 (2.1)                        |
| <b>Respiratory rate (n (%))</b>                                            | 3 (6.4)                        |
| <b>Temperature (n (%))</b>                                                 | 3 (6.4)                        |
| <b>Clinical appearance (n (%))</b>                                         | 18 (38.3)                      |
| <b>Skin colour (n (%))</b>                                                 | 5 (10.6)                       |
| <b>Neurological state (n (%))</b>                                          | 2 (4.3)                        |
| <b>CRP level (n (%))</b>                                                   | 17 (36.2)                      |
| <b>WBC count (n (%))</b>                                                   | 1 (2.1)                        |
| <b>Apnoea/Bradycardia (n (%))</b>                                          | 1 (2.1)                        |
| <b>Feeding difficulties (n (%))s</b>                                       | 1 (2.1)                        |
| <b>Not noted (n (%))</b>                                                   | 12 (25.5)                      |
| <b>Advice NICU (n (%))</b>                                                 | 3 (6.4)                        |
| <b>False negative blood culture due to maternal antibiotic use (n (%))</b> | 1 (2.1)                        |
| <b>X-ray (n (%))</b>                                                       | 2 (4.3)                        |

*Abbreviations: CRP, C-reactive protein; NICU, neonatal intensive care unit; WBC, white blood cell.*

## References

1. NVOG (Nederlandse Vereniging voor Obstetrie en Gynaecologie), NVK (Nederlandse Vereniging voor Kindergeneeskunde). Preventie en behandeling van early-onset neonatale infecties (Adaptatie van de NICE-richtlijn). 2017;(april):1-94.
2. National Institute for Health and Clinical Excellence. Neonatal infection (early onset): Antibiotics for prevention and treatment. Clinical Guideline. Published 2012. <https://www.nice.org.uk/guidance/cg149/resources/neonatal-infection-early-onset-antibiotics-for-prevention-and-treatment-35109579233221>
3. van der Weijden BM, van der Weide MC, Plötz FB, Achten NB. Evaluating safety and effectiveness of the early-onset sepsis calculator to reduce antibiotic exposure in Dutch at-risk newborns: a protocol for a cluster randomised controlled trial. *BMJ Open*. 2023;13(2):1-8. doi:10.1136/bmjopen-2022-069253
4. van der Weijden BM, Achten NB, Bekhof J, Evers EE, Berk M, Kamps AWA, et al. Multicentre study found that adherence to national antibiotic recommendations for neonatal early-onset sepsis was low. *Acta Paediatr Int J Paediatr*. 2021;110(3):791-798. doi:10.1111/apa.15488
